# 1 **Rule-based meta-analysis reveals the major role of PB2 in** 2 **influencing influenza A virus virulence in mice**

3 Fransiskus Xaverius Ivan<sup>1,\*</sup> and Chee Keong Kwoh<sup>1</sup>

4 <sup>1</sup>Biomedical Informatics Lab, Nanyang Technological University, Singapore

5 \* Correspondence: [fivan@ntu.edu.sg](mailto:fivan@ntu.edu.sg)

6

## 7 **Abstract**

8 **Background:** Influenza A virus (IAV) poses threats to human health and life. Many individual  
9 studies have been carried out in mice to uncover the viral factors responsible for the virulence  
10 of IAV infections. Virus adaptation through serial lung-to-lung passaging and reverse genetic  
11 engineering and mutagenesis approaches have been widely used in the studies. Nonetheless, a  
12 single study may not provide enough confident about virulence factors, hence combining  
13 several studies for a meta-analysis is desired to provide better views.

14 **Methods:** Virulence information of IAV infections and the corresponding virus and mouse  
15 strains were documented from literature. Using the mouse lethal dose 50, time series of weight  
16 loss or percentage of survival, the virulence of the infections was classified as avirulent or  
17 virulent for two-class problems, and as low, intermediate or high for three-class problems. On  
18 the other hand, protein sequences were decoded from the corresponding IAV genomes or  
19 reconstructed manually from other proteins according to mutations mentioned in the related  
20 literature. IAV virulence models were then learned from various datasets containing IAV  
21 proteins whose amino acids at their aligned position and the corresponding two-class or three-  
22 class virulence labels. Three proven rule-based learning approaches, i.e., OneR, JRip and  
23 PART, and additionally random forest were used for modelling, and top protein sites and  
24 synergy between protein sites were identified from the models.

25 **Results:** More than 500 records of IAV infections in mice whose viral proteins could be  
26 retrieved were documented. The BALB/C and C57BL/6 mouse strains and the H1N1, H3N2  
27 and H5N1 viruses dominated the infection records. PART models learned from full or subsets  
28 of datasets achieved the best performance, with moderate averaged model accuracies ranged

29 from 65.0% to 84.4% and from 54.0% to 66.6% for two-class and three-class datasets that  
30 utilized all records of aligned IAV proteins, respectively. Their averaged accuracies were  
31 comparable or even better than the averaged accuracies of random forest models and should be  
32 preferred based on the Occam's razor principle. Interestingly, models based on a dataset that  
33 included all IAV strains achieved a better averaged accuracy when host information was taken  
34 into account. For model interpretation, we observed that although many sites in HA were highly  
35 correlated with virulence, PART models based on sites in PB2 could compete against and were  
36 often better than PART models based on sites in HA. Moreover, PART had a high preference  
37 to include sites in PB2 when models were learned from datasets containing concatenated  
38 alignments of all IAV proteins. Several sites with a known contribution to virulence were found  
39 as the top protein sites, and site pairs that may synergistically influence virulence were also  
40 uncovered.

41 **Conclusion:** Modelling the virulence of IAV infections is a challenging problem. Rule-based  
42 models generated using only viral proteins are useful for its advantage in interpretation, but  
43 only achieve moderate performance. Development of more advanced machine learning  
44 approaches that learn models from features extracted from both viral and host proteins must be  
45 considered for future works.

46 **Keywords:** influenza A virus, mouse models, virulence, proteins, meta-analysis, rule-based  
47 classification, random forest.

48

## 49 **Introduction**

50 Influenza A virus (IAV) is a member of the family *Orthomyxoviridae* that circulates in  
51 humans, mammals and birds. The genome of the virus consists of 8 single-stranded, negative-  
52 sense viral RNA segments encoding at least 12 proteins that make up its proteome (**Table 1**).  
53 The surface glycoproteins HA and NA proteins play a role in the entry into a host cell and exit  
54 from the host cell, respectively. Each viral RNA is packaged with multiple copies of NP protein  
55 and an RNA polymerase complex that comprises PA, PB1 and PB2 proteins, to form a rod-like  
56 ribonucleoprotein complex [1]. The RNA polymerase complex plays a role in both  
57 transcription and replication of the viral genomes. The M1 protein mediates virion assembly,  
58 while the M2 protein forms a proton channel that is required for viral entry. The NS1 and NS2

59 proteins are multifunctional. For examples, NS1 is well known to inhibit interferon related  
60 activities (reviewed in [2]), while NS2 has been implicated in mediating the nuclear export of  
61 RNP complexes and the recruiting ATPase for efficient viral exit (reviewed in [3]). PB1-F2  
62 and PA-X proteins are non-essential and encoded by a +1 alternate open reading frame in the  
63 PB1 and PA, respectively. PB1-F2 and PA-X play a role in IAV pathogenesis [4, 5].

64 The HA and NA determine the subtype of IAV. To date, 18 HA (H1-H18) and 11 NA  
65 (N1-N11) have been identified. IAV of H1N1, H2N2, and H3N2 subtypes have been  
66 responsible for five pandemics of severe human respiratory diseases in the last 100 years, i.e.,  
67 the 1918 Spanish Influenza (H1N1), 1957 Asian Influenza (H2N2), 1968 Hong Kong (H3N2),  
68 1977 Russian Influenza (H1N1), and 2009 Swine-Origin Influenza (H1N1) pandemics. The  
69 pandemic strains continuously spread among humans and cause recurrent, seasonal epidemics.  
70 In the last few years, the seasonal human IAVs were mainly dominated by the 1968's H3N2  
71 and 2009's H1N1 strains. In addition to epidemic and pandemic strains, several IAV subtypes  
72 have also caused human infections, including the H5N1, H5N6, H6N1, H7N2, H7N3, H7N7,  
73 H7N9, H9N2, and H10N8 avian influenza viruses [6, 7]. Among them, the H5N1 and H7N9  
74 subtypes have raised a major public health concern due to their ability to cause human  
75 outbreaks with high fatality rate (about 60% ([www.who.int](http://www.who.int)) and 39% [8], respectively).  
76 Overall, IAV poses a threat to human health and life, and therefore further understanding about  
77 the virus is needed for a better surveillance and counteractive measures against it.

78 Many aspects of IAV and the disease it causes have been investigated in mice since the  
79 animals are not only cost-effective and easy to handle, but also available in various inbred,  
80 transgenic, and knockout strains. Moreover, the genomes of various inbred mice have been  
81 recently available. Mice have also allowed us to uncover host and viral molecular determinants  
82 of IAV virulence. Early outcome of IAV study in mice was the revelation of the protective role  
83 of interferon-induced gene Mx1 against the virus [9]. Recently, the gene has been shown to  
84 inhibit the assembly of functional viral ribonucleoprotein complex of IAV [10]. In the last 50  
85 years, the importance of many more host genes in influenza pathogenesis has been discovered  
86 through experiments in mice, including RIG-I, IFITM3, TNF and IL-1R genes (reviewed in  
87 [11, 12]). Nonetheless, one limitation of the existing approaches in investigating host molecular  
88 determinants involved in IAV virulence is that it has not yet taken into account the contribution  
89 of allelic variation to differential host responses.

90 In contrast, the influence of variations in viral genes to IAV virulence have been  
91 investigated in a number of ways. These included the generation of mouse-adapted IAVs  
92 through serial lung-to-lung passaging and recombinant IAVs harboring specific mutations  
93 using plasmid-based reverse genetic techniques combined with mutagenesis approaches. The  
94 application of these techniques has provided various insights about viral mutations involved in  
95 IAV virulence. For example, the increased virulence of IAV during its adaptation in mice has  
96 been associated with mutations in the region 190-helix, 220-loop and 130-loop, which surround  
97 the receptor-binding site in the HA protein (reviewed in [13]). Mutations in PB2 have also been  
98 considered to play a significant role in the increased IAV virulence in mice, which include  
99 mutations E627K and D701N that are considered as general markers for IAV virulence in mice  
100 [11]. Interestingly, a single mutation N66S in the accessory protein PB1-F2 could also  
101 contribute to increased virulence [14]. Mutations in multiple sites of a specific viral protein and  
102 mutations in multiple genes have also been shown to have a synergistic effect on IAV virulence  
103 in mice. For example, synergistic effect of dual mutations S224P and N383D in PA led to  
104 increased polymerase activity and has been considered as a hallmark for natural adaptation of  
105 H1N1 and H5N1 viruses to mammals [15]. Another example is the synergistic action of two  
106 mutations D222G and K163E in HA and one mutation F35L in PA of pandemic 2009 influenza  
107 A/H1N1 virus that causes lethality in the infected mice [16]. Furthermore, virulence may not  
108 only be encoded at protein level, but also at nucleotide level. In a very recent study,  
109 synonymous codons were interestingly able to give rise different virulence levels [17].

110 The confidence of contribution of viral protein sites to the virulence of influenza  
111 infections could be better investigated through a meta-analysis approach, which is a systematic  
112 amalgamation of results from individual studies. Such approach, to our knowledge, has only  
113 been carried out using a Bayesian graphical model to investigate the viral protein sites  
114 important for virulence of influenza A/H5N1 in mammals [18]. Nevertheless, a meta-analysis  
115 approach using Naive Bayes approach at viral nucleotide level has recently been carried out to  
116 demonstrate the contribution of synonymous nucleotide mutations to IAV virulence [17]. In  
117 this paper we present a meta-analysis of viral protein sites that determine the virulence of  
118 infections with any subtype of IAV; however, instead of any mammal, we focus on the  
119 infections in mice. Our meta-analysis approach utilized rule-based machine learnings and  
120 random forest to predict IAV virulence from datasets we created. The creation of the datasets  
121 involved: (i) documentation of the virulence of infections involving particular IAV and mouse  
122 strains, (ii) classification of virulence levels, and (iii) collection of the corresponding IAV

123 proteins. For learning IAV virulence models, each column of the alignments was considered  
124 as a feature vector and the virulence levels as a target vector. When host information was  
125 considered, the amino acids in the columns were tagged with a symbol representing the  
126 corresponding mouse strain. The models were developed using either all records in the datasets  
127 or records for a specific mouse strain or influenza subtype, and using concatenated alignments  
128 of all IAV proteins or an individual alignment of particular IAV proteins. Top protein sites and  
129 synergy between protein sites were then examined for some biological interpretations.

130

## 131 **Methods**

132 **Collection of IAV infections in mice with virulence information.** We collected journal  
133 publications containing virulence information of IAV infection in non-transgenic and non-  
134 knock-out inbred mice. Each unique infection involving specific IAV strain and specific mouse  
135 strain and with known value of MLD50 was recorded. Infections without MLD50 values but  
136 whose time series of weight loss or percentage of survival of infected mice per infection dose  
137 could be estimated from the relevant figures, were also recorded and used to estimate the lower  
138 or upper bound of MLD50; few of them were used to estimate the exact MLD50 using the Reed  
139 and Muench method [19]. Various units for MLD50, which include the plaque forming unit  
140 (PFU), focus forming unit (FFU), egg infectious dose (EID50), tissue culture infectious dose  
141 (TCID50), and cell culture infectious dose (CCID50), were assumed to measure the same  
142 quantity.

143 Next, the levels of virulence were categorized into two classes, i.e., avirulent and virulent.  
144 If the MLD50 of an infection is  $>10E6.0$  (regardless of its unit), then the infection is considered  
145 avirulent; otherwise, virulent. When the class of an infection cannot be determined from the  
146 lower or upper bound of MLD50, then the following rules were used:

147 **RULE 1.** An infection is avirulent if:

148 (i) the infection dose between  $10E4.0$  and  $10E6.0$  leads to  $<15\%$  average weight loss;

149 (ii) the infection dose  $\geq 10E5.0$  does not kill any mouse; or

150 (iii) the infection dose between  $10E3.0$  and  $10E4.0$  leads to  $\leq 10\%$  average weight loss.

151 **RULE 2.** An infection is virulent if:

152 (i) the infection dose  $\leq 10E5.0$  leads to  $\geq 15\%$  average weight loss;

153 (ii) the infection dose  $\leq 10E3.0$  leads to  $\geq 10\%$  average weight loss; or

154 (iii) the infection dose  $\leq 10E3.5$  kills  $\geq 10\%$  mice.

155 The levels of virulence were also categorized into three classes: low, intermediate and high  
156 virulence. If the MLD50  $> 10E6.0$ , then the infection is considered low virulence; if the MLD50  
157  $\leq 10E3.0$ , then the infection is considered high virulence; otherwise, intermediate virulence.  
158 When the class of an infection cannot be determined from the lower or upper bound of MLD50,  
159 then the following rules were used:

160 **RULE 3.** An infection is low virulence if it is considered avirulent (as given in the two class  
161 labelling).

162 **RULE 4.** An infection is intermediate virulence if:

163 (i) the infection dose  $< 10E4.0$  leads to  $\geq 10\%$  average weight loss;

164 (ii) the infection dose between  $10E4.0$  and  $10E5.0$  leads to  $\geq 15\%$  average weight loss; or

165 (iii) the infection dose between  $10E5.0$  and  $10E6.0$  leads to  $\geq 20\%$  average weight loss.

166 **RULE 5.** An infection is high virulence if:

167 (i) the infection dose  $\leq 10E6.0$  kills  $\geq 80\%$  mice or leads to  $\geq 25\%$  average weight loss; or

168 (ii) the infection dose  $\leq 10E1.0$  kills  $\geq 20\%$  mice.

169 Following this, multiple records for infection involving specific IAV and mouse strains  
170 were reduced into a single record (**Table S2**) by the following procedure (termed as **RULE 6**):

171 (i) Specify the majority class of the three-class virulence assignment for those records; when  
172 no majority, consider the class that is more or the most virulent.

173 (ii) Select the record with:

- 174 - the highest lower bound of MLD50 value when only lower bound of MLD50 values  
175 presented;
- 176 - the lowest exact or upper bound of MLD50 value when they are available; but when  
177 the highest lower bound of MLD50 value is lower than this value, then calculate the  
178 average of those two values and assign the virulence class as described previously.

179 This procedure selects a record that has the more or most virulent information among the  
180 records (with the majority class if it can be determined), except when only lower bound of  
181 MLD50 values are available. Note that when applying this procedure, the recombinants of  
182 naturally occurring or wild-type IAV strains were considered representing the wild-type  
183 version. In a similar fashion, we applied this procedure to reduce multiple records for infection  
184 of a specific IAV strain in different mouse strains into a single record (**Table S3**).

185

186 **Collection of related genomes and main proteins.** IAV strains found in the literature were  
187 searched online by their name, and their nucleotide sequences were collected from GenBank  
188 or GISAID EpiFlu databases. A number of sequences were obtained from the authors directly.  
189 When the genomic segments of a particular virus were incomplete, the HA and/or NA of the  
190 virus were BLASTed against GenBank database and the top virus hit whose complete genomes  
191 were available was used to extrapolate the incomplete genome (**Table S4**). Considering the  
192 closeness between their names, the genome of influenza A/Turkey/15/2006(H5N1) was used  
193 to represent the genome of influenza A/Turkey/13/2006(H5N1) that was not available.  
194 Furthermore, we extrapolated partial IAV sequences by using the closest complete IAV  
195 sequence identified by BLAST (**Table S5**). Then, the reassortant viruses reported in the  
196 literature were reconstructed using relevant genomic segments. Following the collection of  
197 IAV genomes, the 12 IAV proteins were obtained by identifying their coding sequence regions  
198 using Influenza Virus Sequence Annotation Tool available at the NCBI Influenza Virus  
199 Resource and then translating them into proteins according to standard genetic code. Some  
200 proteins, mainly for mutant viruses, were generated from existing proteins according to the list  
201 of amino acid differences at various sites reported in the literature. Note that some IAVs were  
202 represented by different versions of genomes or sets of proteins, but the reassortant or mutant  
203 viruses were mainly reconstructed from one of the versions.

204

205 **Machine learning approaches for IAV virulence prediction.** Three rule-based machine  
206 learning approaches, i.e., OneR, JRip and PART that are available in RWeka [20], and random  
207 forest (RF) available in randomForest package for R [21] were explored to develop predictive  
208 models for IAV virulence. Various input datasets were considered (see the first section of  
209 results), but in general, the input datasets consisted of IAV proteins that have been aligned with  
210 muscle package [22] and their target virulence class. The datasets included either the  
211 alignments of all IAV proteins or an individual alignment of particular IAV proteins. Each  
212 column in the alignment that contained more than one symbol was considered as a single  
213 feature vector – H3 and N2 numberings were used to label the position in the alignments of  
214 HA and NA, respectively. Input datasets that incorporated the host strain information, where  
215 each amino acid in the alignments was tagged with a symbol indicating associated host strain,  
216 were also considered. For each input dataset, each learning algorithm and each of two-class  
217 and three-class virulence groupings, rule-based and RF models were learned independently 100  
218 times. In each iteration, the dataset was balanced by reducing the size of the bigger (biggest)  
219 class to the size of the smaller (smallest) class through sampling without replacement. To  
220 develop a learning model, 60% of the records (rows of the alignment) from each virulent class  
221 were used as training data, while the rest were used as test data. Performance metrics that  
222 included accuracy, macro-averaged precision and macro-averaged recall were calculated to  
223 evaluate the models.

224

225 **Visualization, statistical analyses and site rankings.** The concatenated alignments of IAV  
226 proteins were visualized in 3D Cartesian coordinates. For this, a matrix of pairwise distances  
227 from concatenated protein alignments was computed using Fitch similarity matrix and then the  
228 Kruskal's non-metric multidimensional scaling available in R's MASS package [23] was  
229 applied to place each record of concatenated protein sequences in a 3D space.

230 The correlations between sites in the alignment and the target virulence class were  
231 measured using the Benjamini-Hochberg adjusted p-values of the chi-square test of  
232 independence. The  $-\log(\text{adjusted p-value})$  of the test over the sites of each IAV protein was  
233 visualized with a line plot.

234 Wilcoxon signed-rank sum test was used to test the null hypothesis that the median of  
235 the accuracy of 100 models learned independently is equal to the accuracy of zero rule learner



236 (which assigns predicted class to the majority class in the training set) and to test the null  
237 hypothesis that the median of the accuracy of one learner is greater than that of another learner.  
238 The p-values of the tests were adjusted using the Bonferroni method.

239 Following 100 independent learnings from two-class and three-class IV datasets, the  
240 protein sites from models learned using each algorithm were ranked. For OneR, the sites were  
241 ranked according to their frequency of being selected for the models; for JRip and PART, the  
242 sites were ranked according to their averaged contribution to the accuracy of learned models;  
243 and for RF, the sites were ranked according to their contribution to the averaged mean decrease  
244 in accuracy. For PART models, we also ranked the site pairs according to their averaged  
245 contribution to the accuracy of learned models and visualized the synergistic graph arises from  
246 the top 50 site pairs using igraph package for R software [24].

247

## 248 **Results**

### 249 **Datasets for modelling IAV virulence**

250 The steps in creating benchmark datasets for modeling IAV virulence is summarized in  
251 **Fig. 1**. Initially, a dataset containing 637 records of IAV infections in mice, where the full or  
252 incomplete genome of the IAVs could be retrieved from public sequence databases and the  
253 virulence class of the infection could be identified, was created according to information  
254 available in 84 journal publications (**Table S1**). Of those records, 502 records have their  
255 MLD50 provided in the literature. Following **RULE 6** (see Methods), multiple records  
256 involving specific IAV and mouse strains were reduced into a single record (**Table S2**). This  
257 produced a new dataset containing 555 records and named as Mouse-IAV Virulence (MIVir)  
258 dataset. Using the same rule, the MIVir dataset was further reduced to a dataset containing 489  
259 records of IAV virulence across different mouse strains and named as IAV Virulence (IVir)  
260 dataset.

261 The MIVir and IVir datasets were then joined with another dataset containing the 12 IAV  
262 proteins whose amino acids in their aligned position (IAV Proteins (IP) dataset), producing  
263 MIVir  $\times$  IP and IVir  $\times$  IP datasets, respectively. The keys for joining the dataset were the IAV  
264 strains listed in MIVir or IVir dataset. Once again, note that some virus strains were represented  
265 by multiple records in IP dataset and some proteins were generated from extrapolated genomes.

266 The breakdowns of the joined datasets are shown in **Fig. 1**, and more detailed breakdowns of  
267 MIVir  $\times$  IP are shown in **Table 2**. As shown in the figure and table, the final datasets were  
268 mainly dominated by experiments involving BALB/C and C57BL/6 mice and IAV subtypes  
269 H1N1, H3N2 and H5N1. Much lesser mouse strains in the records included the 129S1/SvImJ,  
270 129S1/SvPasCrIVr, A/J, C3H, CAST/EiJ, CBA/J, CD-1, DBA/2, FVB/NJ, ICR, NOD/ShiLtJ,  
271 NZO/HILtJ, PWK/PhJ, SJL/JOrlCrI, and WSB/EiJ mice, while much lesser IAV subtypes  
272 included the H1N2, H3N8, H5N2, H5N5, H5N6, H5N8, H6N1, H7N1, H7N2, H7N3, H7N7,  
273 H7N9 and H9N2. Subsets of MIVir  $\times$  IP dataset used for virulence prediction included dataset  
274 containing all records (named as MIV dataset) and datasets containing records of infections in  
275 BALB/C and C57BL/6 mice (BALB/C and C57BL/6 datasets, respectively); while subsets of  
276 IVir  $\times$  IP dataset used for virulence prediction included dataset containing all records (IV  
277 dataset) and datasets containing infections with H1N1, H3N2 and H5N1 viruses (H1N1, H3N2  
278 and H5N1 datasets, respectively).

279

## 280 **Visualization of IV dataset**

281 For an initial view of the IAV sequences being used for virulence prediction, the 3D  
282 MDS plot that visualizes the level of similarity between concatenated alignments of IAV  
283 proteins in the IV dataset is presented in **Fig. 2**. While the clusters of dominant IAV subtypes  
284 can be easily observed in the plot, separation between virulence classes is lack and this  
285 illustrates the challenge in the prediction.

286 In addition, the correlation between each site and the target virulence in the dataset was  
287 also measured using the adjusted p-value of the chi-square test of independence. The line plots  
288 showing the  $-\log(\text{adjusted p-value})$  over the alignment sites of each IAV protein and each of  
289 two-class and three-class virulence groupings are given in **Fig. 3**. Overall, HA has many more  
290 sites that have a significant correlation with the target virulence (adjusted p-value  $<0.05$ ), i.e.,  
291 72 and 283 sites for two-class and three-class virulence grouping, respectively. On the other  
292 hand, M2 has the least numbers of significant sites, i.e., 1 and 4 for two-class and three-class  
293 virulence, respectively. The numbers of significant sites for other proteins and for two-class  
294 and three-class virulence grouping, respectively, are as follows: 26 and 44 for PB2, 6 and 30  
295 for PB1, 14 and 33 for PA, 19 and 40 for NP, 19 and 167 for NA, 4 and 10 for M1, 18 and 32  
296 for NS1, 3 and 30 for PB1-F2, 6 and 26 for PA-X, and 3 and 5 for NS2. Interestingly, while

297 PB2, PA, NP, M1, NS1 and NS2 have their number of significant sites for three-class virulence  
298 about twice the number of significant sites for two-class virulence, the PB1, HA, NA, PB1-F2  
299 and PA-X have a much higher fold increase in the number of significant sites.

300

### 301 **Performance of rule-based models for IAV virulence**

302 Here we focus on the application of OneR, JRip and PART algorithms on MIV, BALB/C,  
303 C57BL/6, IV, H1N1 and H3N2 datasets in developing rule-based models for IAV virulence.  
304 **Table 3** highlights the performance of OneR, JRip and PART on various two-class and three-  
305 class datasets with concatenated protein alignments, while examples of the output models and  
306 their summary (for H1N1) are presented in **Table S6**. Overall, in terms of their accuracy,  
307 precision and recall (but we mainly focus on the accuracy in the rest of the paper), PART  
308 models always outperformed OneR and JRip, while JRip were almost always better than OneR  
309 (the only case where OneR outperformed JRip was on the three-class classification problem  
310 for H3N2). Nonetheless, PART had many more rules compared to JRip and OneR. For  
311 example, on IV dataset, PART had on average 10.67 and 46.97 rules per model for two-class  
312 and three-class virulence grouping, respectively; while JRip had on average 3.89 and 4.55,  
313 respectively, and OneR always had 1 rule.

314 **Table 3** also shows that incorporating host information improved the accuracy of three-  
315 class virulence grouping but not for two-class virulence grouping – the mean accuracies of  
316 PART models on three-class MIV and IV datasets were 60.2% and 56.3%, respectively, but  
317 they were about the same for two-class virulence grouping, i.e., 71.8% for MIV dataset and  
318 72.4% for IV dataset. Furthermore, when a specific host strain was considered, we can see that  
319 a rule-based model was easier to learn from C57BL/6 dataset than BALB/C dataset; and when  
320 a specific IAV subtype was considered, H3N2 dataset was easier to learn than H1N1 and H5N1  
321 datasets. However, it ought to be noted that the standard deviations for C57BL/6 and H3N2  
322 datasets were higher than the rest, and that aggregating all mouse and/or virus strains gave the  
323 smallest standard deviation while keeping accuracy competitive.

324 The accuracy distribution per learning algorithm per input dataset derived from MIV and  
325 IV datasets over 100 models learned independently is shown in **Fig. 4**, while the accuracy  
326 distribution per learning algorithm per input dataset derived from BALB/C, C57BL/6, H1N1  
327 and H3N2 is shown in **Fig. S1** and **Fig. S2**. Once again, we can observe that PART models

328 often outperformed OneR and JRip, and OneR occasionally outperformed JRip. Of interest,  
329 models trained on input dataset containing concatenated protein alignments were often better  
330 than the ones trained on input containing an alignment of a particular type of IAV protein.  
331 Nonetheless, models trained on a particular protein alignment usually achieved averaged  
332 accuracies significantly higher than those given by zero rules. The accuracies of models based  
333 on alignment of PB2 and/or HA were usually higher than the accuracies of models based on  
334 alignment of other proteins. For some cases, the models based only on PB2 or HA could even  
335 achieve accuracies as good as those given by the models based on concatenated protein  
336 alignments (see the accuracies of models based on PB2 for two-class and three-class H3N2  
337 datasets, PB2 for two-class H5N1 dataset, and HA for two-class H1N1 dataset in **Fig. S2**).

338 Finally, we noted that RF models did not outperform PART models. In about 50% of the  
339 cases, PART even gave significantly better accuracies than RF (**Fig. S3**). Nonetheless, the site  
340 importance ranking output by RF could provide valuable insights and hence, RF models were  
341 further explored.

342

### 343 **Top sites and synergy between sites for IAV virulence**

344 As the performance of the models generated by a specific learning algorithm varied from  
345 one independent learning to another, the models themselves tended to vary a lot. This  
346 demonstrated the influence of selected training data. Hence, rather than inspecting the model  
347 one by one, it is more interesting to investigate individual sites that were frequently included  
348 in learned models or considered to have more impacts in the models. For this, the OneR's single  
349 site model and RF's site importance ranking naturally suit the purpose. For JRip and PART,  
350 we calculated the averaged contribution of each site to the accuracy of learned models. **Table**  
351 **4** summarizes the sites selected by OneR (ordered by their frequency; sites that were selected  
352 once are not shown), top 20 sites by JRip and PART (ordered by their averaged contribution to  
353 the accuracy of learned models), and top 20 influential sites by RF (ordered by the averaged  
354 mean decrease in accuracy) following 100 independent learnings from both two-class and  
355 three-class IV datasets containing concatenated protein alignments.

356 Overall, for the top sites in Table 4, OneR and JRip preferred sites in HA and NA, PART  
357 had a high preference towards sites in PB2, and RF pointed out more sites in PB2 and HA were  
358 important. In terms of their consistency in selecting sites for two-class and three-class virulence

359 models, RF was the most consistent (15 shared sites), followed by PART (10 shared sites),  
360 JRip (8 shared sites) and finally OneR (only 4 sites). Furthermore, no site was shared by all  
361 four learners for either two-class or three-class virulence grouping; but there were few sites  
362 shared by combinations of three learners: PB2-627, PB2-701, PA-97 and NA-46 for two-class  
363 virulence grouping, and PB2-627, PA-97 and NS1-42 for three-class virulence grouping.

364 In addition to analyzing individual sites, it is also interesting to investigate the synergy  
365 between sites that determine IAV virulence. The rule-based models given by JRip and PART  
366 serve this purpose, but here we limit to PART models that gave the highest accuracy. For this,  
367 in similar way to the identification of top individual sites, we extracted the averaged  
368 contribution of each pair of sites appearing in each rule in PART models to the overall  
369 accuracy. The synergistic networks arising from top 50 site pairs in PART models learned from  
370 two-class and three-class IV datasets are shown in **Fig. 5A** and **5B**, respectively. As shown, the  
371 sites in both cases are interestingly fully connected and mainly involved sites in PB2. Top 4  
372 sites that had highest degree (number of connections) for two-class virulence grouping included  
373 PB2-714 (degree = 14), PA-97 (13), NS1-42 (10) and PB2-701 (7), and interestingly, the  
374 pairing between top two sites PB2-714 and PA-97 had the highest contribution to accuracy. On  
375 the other hand, sites that have highest degree for three-class virulence grouping included PB2-  
376 110 (15), PB2-158 (13), NS1-42 (10) and PB2-153 (9), and the pairing between PB2-153 and  
377 NS1-42 had the highest contribution to accuracy.

378

## 379 **Discussions**

380 In this influenza study, we systematically and extensively searched literature, collected  
381 infection records involving specific mouse and IAV strains, noted their virulence, classified  
382 the virulence level (the various units of infection dose were assumed to measure the same  
383 quantity and the MLD50 thresholds 10E3.0 and 10E6.0 for virulence classification follow the  
384 thresholds used by WHO when the infection doses measured with EID50 [25]), and obtained  
385 related IAV proteins in order to develop predictive virulence models of IAV infections.  
386 Furthermore, we proposed a number of procedures to tackle various missing data. For  
387 virulence, the MLD50 value is the ultimate information we looked for; but in its absence, time  
388 series of weight loss or percentage of survival of infected mice were utilized to infer the lower  
389 or upper bound of MLD50 and subsequently, to label the virulence class. For IAV genomes,

390 when the genomes were incomplete or contained partial sequences, extrapolation was  
391 performed using the closest genome relative identified with BLAST. These pre-processing  
392 works were done manually and ambiguity occasionally occurred. Hence, caution must be taken  
393 when dealing with the datasets and improvement in the pre-processing approach may be  
394 considered for future works. Alternatively, efforts in improving the current practice of storing  
395 IAV virulence information by research community such that it eases its reusability could be  
396 encouraged, e.g., by creating an online database that accepts submissions of IAV virulence  
397 related data and provides high quality tables or figures of their input data that can be added into  
398 their manuscript.

399         Despite the limitations of the datasets due to the ways in handling missing MLD50,  
400 partial sequences and incomplete genomes, and also a recent critic of using LD50 as a virulence  
401 measure [26], the models learned from the datasets could provide insights about IAV virulence  
402 across mouse and virus strains. Rule-based models were chosen since their output can be easily  
403 interpreted and are congruent with the current practice in investigating IAV virulence  
404 experimentally. Three rule-based learning approaches were employed: OneR, JRip and PART.  
405 OneR approach outputs a single site model that gives the highest accuracy [27]; JRip and PART  
406 considers multiple sites and they construct a set of decision rules using different strategy. While  
407 JRip mainly uses separate-and-conquer algorithms [28], PART combines separate-and-  
408 conquer strategy and partial decision trees [29]. For a comparison in the performance, we also  
409 explored the RF approach [30] in modelling IAV virulence.

410         For the models and their performance, we first noted that OneR mainly selected sites in  
411 HA and NA for its single site models, and the OneR models could give significantly better  
412 averaged accuracies than the zero rule models. Among the sites, some have known functions  
413 while some others are not yet characterized. For example, site 188 is known to be located at  
414 the helix 190 that surrounds the receptor-binding site in the HA protein and thus it affects host  
415 specificity [31], while site 142 has not yet been well studied even though it was frequently  
416 selected as the top OneR classifier. Nonetheless, JRip and PART generated multiple site  
417 models that almost always gave better accuracies than OneR models for any specific IAV  
418 protein. Of interest, PART not only outperformed OneR and JRip, but also RF in 50% of the  
419 tested cases. Moreover, higher accuracy generally could be achieved by PART when  
420 considering all IAV proteins at once. These results demonstrate a synergistic between sites  
421 within a single protein and sites in different proteins; in other words, the polygenic nature of

422 IAV virulence in mice. This is consistent with the observations from various experimental  
423 studies, such as the ones that demonstrate intra-protein synergy in PB2 [32-37], PA [15], and  
424 NS1 [38, 39], and inter-protein synergy that involves combinations of PB2, PB1, PA, HA or  
425 NA [16, 40-46].

426 Further inspection on PART models across different IAV strains using IV dataset  
427 revealed that although HA had many more sites correlated with virulence, PB2 seemed to play  
428 more important role in determining IAV virulence. This was in agreement with the RF's site  
429 importance ranking. In terms of their accuracy, PART models based on PB2 alone could  
430 compete against or were even better than PART models based on HA; except when modelling  
431 the virulence of H1N1 virus alone, PART models based on HA from two-class datasets were  
432 more superior (see **Fig. S2A**). Moreover, PART models based on all IAV proteins have a high  
433 preference towards sites in PB2, and many sites in PB2 were also considered as the most  
434 important features for RF models (**Table 4**). **Fig. 5** that shows synergistic graphs for two-class  
435 and three-class virulence grouping further clearly demonstrate this. Investigations on MIV  
436 dataset and datasets for specific IAV or mouse strain also revealed the dominance of PB2 in  
437 most of the cases (data not shown). When sites in PB2 did not dominate, the sites in HA  
438 dominated, such as in the case for two-class H1N1 dataset.

439 The critical role of PB2 in determining virulence in mice have been indeed highlighted  
440 for various strains, including H3N2 [44, 47], H5N1 [32-34, 48, 49], H5N8 [36, 50], H7N9 [51-  
441 55], H9N2 [35, 37, 55, 56] and H10N8 [55]. Among the top 20 sites in PB2 for PART models,  
442 sites 627 and 701 have been repeatedly shown to affect IAV virulence in mammals including  
443 mice. Site 627 is considered critical for efficient replication, while site 701 influences  
444 polymerase activity via its interaction with the nuclear import factor importin  $\alpha$  that mediates  
445 the transport of proteins into nucleus [57]. Other top sites in PB2 are also known to contribute  
446 to virulence. For examples, site 714 (top 20 for two-class IV dataset) influences replication  
447 efficiency and IAV virulence in mice in combination with site 701 [33, 58, 59]; site 66 (top 20  
448 for three-class IV dataset) sets a prerequisite for acquiring virulence [60]; and site 158 (top 20  
449 for two-class and three-class IV dataset; specifically, top one for three-class) strongly  
450 influences the virulence of both pandemic H1N1 and H5 influenza viruses in mice [61].  
451 Experimental evidence for the contribution of other top sites in PB2 to virulence, e.g., sites 80,  
452 110 and 153, are still none to our knowledge. On the other hand, some other sites not in the top

453 list have been shown to play a role in dictating virulence, e.g., sites 147, 339 and 588 that can  
454 synergize to give rise a higher level of virulence [34].

455 Next, the synergistic graph for two-class virulence grouping interestingly presents a  
456 clustering of two subgraphs for sites in PART virulence models, with sites PB2-714, PA-97  
457 and NS1-42 act as a bottleneck (a node with high betweenness centrality, i.e., having many  
458 shortest paths going through it) connecting the two subgraphs. Furthermore, when three-class  
459 was considered, the synergistic graph containing top site pairs concentrated and expanded in  
460 the subnetwork that included sites PB2-80, PB2-110, PB2-153, PB2-297, NA-300, NS1-42,  
461 and M1-215. This may indicate a greater role of these sites in sensitizing the virulence level of  
462 IAV infections. For example, site 42 within the RNA-binding domain of NS1 influences the  
463 capability of the protein in binding double-stranded RNA and it determines the degree of  
464 pathogenicity in mice [62]. This site also influences the activation of IRF3 and regulation of  
465 host interferon response, which subsequently influences the efficiency of viral replication [63].  
466 Another site that has been experimentally explored is site 215 in M1, which also contributes to  
467 the degree of IAV virulence [64].

468 Overall, PART, with its approach that combines separate-and-conquer strategy and  
469 partial decision tree, has been a suitable method to generate sequence-based virulence models  
470 that are not only considerably good in performance, but also provides interpretable information.  
471 But here, rather than relying on a single model developed from a single training dataset, the  
472 information was extracted from 100 models learned independently from different training  
473 datasets. While bias due to imbalanced classes were resolved by under-sampling to obtain  
474 balanced classes, the iterations might help reducing bias due to over-sampling of a particular  
475 mouse or IAV strain. Furthermore, we also noted from the confusion matrix that PART models  
476 tended to misclassify the avirulent (or less virulent) strains as virulent (or more virulent) ones  
477 rather than misclassify the virulent (more virulent) strains as avirulent (or less virulent) ones.  
478 In practice, this is preferred since classifying the virulent (more virulent) strains as avirulent  
479 (less virulent) ones is a worse decision that can cost lives.

480 In terms of their accuracy, PART models achieved moderate performance for various  
481 datasets being learned. The average accuracy over 100 models ranged between 65.0% and  
482 84.4% (15.0% - 34.4% above baseline) for two-class datasets that utilized all IAV proteins,  
483 and between 54.0% and 66.6% (20.7% - 33.3% above baseline) for three-class datasets (see  
484 **Table 3**). Learning from subsets of specific mouse or IAV strains revealed that some strains



485 were easier while others were harder to learn. Of interest, while the average accuracies were  
486 relatively the same for full two-class datasets regardless the host information was included or  
487 not, some significant improvement (3.9% in increase of accuracy) was observed when  
488 incorporating host information for full three-class dataset. Thus, using learning approaches that  
489 further incorporate host information shall be encouraged, especially since several laboratory  
490 experiments have demonstrated the importance of host genetic backgrounds in determining  
491 IAV virulence [65-71]. In particular, with the availability of genomes and proteomes of various  
492 mouse strains, sophisticated methods that are based on host-pathogen protein-protein  
493 interactions might be of interest. If successful, an implementation of such methods may be  
494 translated to human cases and other diseases to improve our understanding about disease  
495 mechanisms, establish a foundation for future personalized medicine, and provide a better  
496 surveillance. Nevertheless, the development of the approaches will be more fruitful if there is  
497 a significant increase in the number of influenza experiments carried out with mouse and IAV  
498 strains that are still limited in their number of studies.

499 In summary, we have developed benchmark datasets for IAV virulence and explored  
500 rule-based and RF approaches for modelling IAV virulence. To our knowledge, the datasets  
501 have been the biggest aggregation of IAV infections in mice, and the number of the infection  
502 records can still grow. The creation of these benchmark datasets will be beneficial for further  
503 understanding the molecular principles underlying influenza mechanisms since mice have been  
504 a major animal model for influenza. In the current study, we utilized the datasets to assess  
505 predictabilities of IAV virulence for specific and across mouse and IAV strains, and identify  
506 top proteins sites and synergy between protein sites that contribute to IAV virulence. Overall,  
507 our study confirmed the polygenic nature of IAV virulence, with several sites in PB2 playing  
508 more dominant roles. Not only sites that are well known as IAV virulence markers, e.g. 627,  
509 701 and 714, but also some other sites in PB2 not yet known influencing virulence were  
510 identified. Nonetheless, modelling virulence is in fact a very challenging problem due to the  
511 nature of complex interactions that underlie the phenotype, which involve not only viral factors,  
512 but also host factors. Hence, future works shall incorporate more host information, especially  
513 the host proteomic data that now widely available for various mouse strains. Applying different  
514 machine learning approaches and protein features, and posing virulence modelling as a  
515 regression problem that predicts LD50 shall also be considered.

516

517 **Acknowledgements**

518 The project is supported by AcRF Tier 2 Grant MOE2014-T2-2-023, Ministry of Education,  
519 Singapore.

520

521

522

523

524

525

526

527

528

529

530

531

532

533

534

535

536

537

538

539 **Table 1.** IAV segments and their encoded proteins

| Segment | Protein 1 (p1)                 | Protein 2 (p2)                                                             |
|---------|--------------------------------|----------------------------------------------------------------------------|
| 1 – PB2 | RNA polymerase B2 (PB2)        |                                                                            |
| 2 – PB1 | RNA polymerase B1 (PB1)        | Non-structural protein PB1-F2                                              |
| 3 – PA  | RNA polymerase A (PA)          | Non-structural protein PA-X                                                |
| 4 – HA  | Hemagglutinin (HA)             |                                                                            |
| 5 – NP  | Nucleoprotein (NP)             |                                                                            |
| 6 – NA  | Neuraminidase (NA)             |                                                                            |
| 7 – M   | Matrix protein 1 (M1)          | Matrix protein 2 (M2; also known as ion channel protein)                   |
| 8 – NS  | Non-structural protein 1 (NS1) | Non-structural protein 2 (NS2; also known as nuclear export protein (NEP)) |

540

541 **Table 2.** Cross-tabulation between mouse strains and IAV subtypes in MIV dataset. The  
 542 number at the top in each cell corresponds to the number of records of relevant infections, and  
 543 the number of cases for each of three-virulent class, i.e., high, intermediate and low virulence,  
 544 are shown in order in the bracket. The number of virulent cases for two-class virulence  
 545 grouping is the sum of the number of high and intermediate virulence cases, while the number  
 546 of avirulent cases equals to the number of low virulence cases.

| Mouse strain   | IAV subtype       |                  |                   |                   | Total                |
|----------------|-------------------|------------------|-------------------|-------------------|----------------------|
|                | H1N1              | H3N2             | H5N1              | Others            |                      |
| <b>BALB/C</b>  | 123<br>(35/40/48) | 14<br>(4/2/8)    | 162<br>(69/40/53) | 136<br>(39/49/48) | 435<br>(147/131/157) |
| <b>C57BL/6</b> | 61<br>(14/34/13)  | 17<br>(1/2/14)   | 6<br>(6/0/0)      | 26<br>(10/5/11)   | 110<br>(31/41/38)    |
| <b>CD-1</b>    | 0<br>(0/0/0)      | 34<br>(5/16/13)  | 0<br>(0/0/0)      | 0<br>(0/0/0)      | 34<br>(5/16/13)      |
| <b>DBA/2</b>   | 21<br>(14/5/2)    | 15<br>(2/5/8)    | 0<br>(0/0/0)      | 6<br>(2/2/2)      | 42<br>(18/12/12)     |
| <b>Others</b>  | 19<br>(9/3/7)     | 7<br>(5/0/2)     | 1<br>(0/0/1)      | 1<br>(0/1/0)      | 28<br>(14/4/10)      |
| <b>Total</b>   | 224<br>(72/82/70) | 87<br>(17/25/45) | 169<br>(75/40/54) | 169<br>(51/57/61) | 649<br>(215/204/230) |

547

548

549

550

551

552

553 **Table 3.** Accuracy, macro-averaged precision and macro-averaged recall of models generated  
 554 by OneR, JRip and PART from various input datasets containing concatenated alignments of  
 555 IAV proteins. For each cell, the number at the top is the mean of performance values calculated  
 556 from 100 models learned independently; while the number in the bracket is related standard  
 557 deviation.

|                                       | Accuracy (%)  |                |                       | Macro-averaged Precision (%) |                |                       | Macro-averaged Recall (%) |                |                       |
|---------------------------------------|---------------|----------------|-----------------------|------------------------------|----------------|-----------------------|---------------------------|----------------|-----------------------|
|                                       | OneR          | JRip           | PART                  | OneR                         | JRip           | PART                  | OneR                      | JRip           | PART                  |
| <b>Two-class virulence grouping</b>   |               |                |                       |                              |                |                       |                           |                |                       |
| MIV                                   | 58.6<br>(3.6) | 58.8<br>(5.9)  | <b>71.8</b><br>(3.8)  | 59.1<br>(3.8)                | 59.9<br>(6.8)  | <b>72.2</b><br>(3.8)  | 58.6<br>(3.6)             | 58.8<br>(5.9)  | <b>71.8</b><br>(3.8)  |
| BALB/C                                | 54.6<br>(3.8) | 57.5<br>(5.5)  | <b>70.6</b><br>(4.8)  | 55.1<br>(4.3)                | 58.3<br>(6.4)  | <b>71.0</b><br>(4.9)  | 54.6<br>(3.8)             | 57.5<br>(5.5)  | <b>70.6</b><br>(4.8)  |
| C57BL/6                               | 70.7<br>(7.9) | 73.4<br>(7.4)  | <b>74.3</b><br>(7.1)  | 72.6<br>(8.6)                | 75.0<br>(7.5)  | <b>75.4</b><br>(7.1)  | 70.7<br>(7.9)             | 73.4<br>(7.4)  | <b>74.3</b><br>(7.1)  |
| IV                                    | 55.2<br>(4.0) | 60.4<br>(6.1)  | <b>72.4</b><br>(4.0)  | 55.8<br>(4.4)                | 61.2<br>(6.5)  | <b>72.8</b><br>(4.1)  | 55.2<br>(4.0)             | 60.4<br>(6.1)  | <b>72.4</b><br>(4.0)  |
| H1N1                                  | 58.7<br>(6.0) | 59.2<br>(6.3)  | <b>65.0</b><br>(7.5)  | 61.8<br>(8.0)                | 61.9<br>(8.1)  | <b>65.8</b><br>(7.6)  | 58.7<br>(6.0)             | 59.2<br>(6.3)  | <b>65.0</b><br>(7.5)  |
| H3N2                                  | 72.1<br>(9.2) | 80.7<br>(11.5) | <b>84.4</b><br>(8.4)  | 79.4<br>(8.8)                | 84.1<br>(9.7)  | <b>86.5</b><br>(7.4)  | 72.1<br>(9.2)             | 80.7<br>(11.5) | <b>84.4</b><br>(8.4)  |
| H5N1                                  | 57.3<br>(6.4) | 64.9<br>(8.1)  | <b>72.4</b><br>(6.9)  | 62.1<br>(10.6)               | 67.2<br>(8.8)  | <b>73.3</b><br>(7.3)  | 57.3<br>(6.4)             | 64.9<br>(8.1)  | <b>72.4</b><br>(6.9)  |
| <b>Three-class virulence grouping</b> |               |                |                       |                              |                |                       |                           |                |                       |
| MIV                                   | 45.7<br>(2.6) | 44.5<br>(3.4)  | <b>60.2</b><br>(3.0)  | 46.6<br>(3.1)                | 52.8<br>(5.3)  | <b>60.3</b><br>(2.9)  | 45.7<br>(2.6)             | 44.5<br>(3.4)  | <b>60.2</b><br>(3.0)  |
| BALB/C                                | 39.8<br>(3.5) | 42.1<br>(4.2)  | <b>55.4</b><br>(3.5)  | 40.7<br>(4.8)                | 49.1<br>(6.9)  | <b>55.5</b><br>(3.5)  | 39.8<br>(3.5)             | 42.1<br>(4.2)  | <b>55.4</b><br>(3.5)  |
| C57BL/6                               | 60.4<br>(5.8) | 61.9<br>(7.2)  | <b>66.6</b><br>(7.5)  | 65.6<br>(7.6)                | 66.3<br>(7.1)  | <b>68.6</b><br>(7.8)  | 60.4<br>(5.8)             | 61.9<br>(7.2)  | <b>66.6</b><br>(7.5)  |
| IV                                    | 42.1<br>(3.2) | 42.5<br>(3.3)  | <b>56.3</b><br>(3.5)  | 43.4<br>(4.4)                | 47.9<br>(6.5)  | <b>56.6</b><br>(3.5)  | 42.1<br>(3.2)             | 42.5<br>(3.3)  | <b>56.3</b><br>(3.5)  |
| H1N1                                  | 43.3<br>(5.0) | 44.0<br>(7.1)  | <b>54.6</b><br>(6.6)  | 48.4<br>(8.2)                | 50.3<br>(9.7)  | <b>55.5</b><br>(7.0)  | 43.3<br>(5.0)             | 44.0<br>(7.1)  | <b>54.6</b><br>(6.6)  |
| H3N2                                  | 47.9<br>(8.9) | 43.0<br>(9.5)  | <b>60.9</b><br>(11.7) | 61.4<br>(17.1)               | 59.3<br>(14.6) | <b>64.4</b><br>(13.6) | 47.9<br>(8.9)             | 43.0<br>(9.5)  | <b>60.9</b><br>(11.7) |
| H5N1                                  | 38.0<br>(5.8) | 42.1<br>(6.9)  | <b>54.0</b><br>(7.5)  | 39.7<br>(8.6)                | 47.6<br>(10.6) | <b>55.1</b><br>(7.8)  | 38.0<br>(5.8)             | 42.1<br>(6.9)  | <b>54.0</b><br>(7.5)  |

558

559

560

561

562

563

564

565

566 **Table 4.** Top sites for modelling IAV virulence based on models generated from two-class  
 567 and three-class IV datasets. For OneR, the numbers in brackets are the frequency of the  
 568 corresponding site being selected in the models; for JRip and PART, they are the averaged  
 569 contribution of the corresponding site to accuracy (in percent); and for random forest (RF),  
 570 they are the averaged mean decrease in accuracy attributed to the corresponding site. Each  
 571 number was calculated following 100 independent learnings from two-class or three-class IV  
 572 dataset. For OneR, only sites with frequency >1 are shown, while for JRip, PART and RF, only  
 573 top 20 sites are shown.

| <b>Two-class virulence grouping</b>   |                                                                     |                                                                     |                                                                      |                                                                     |                                                                       |
|---------------------------------------|---------------------------------------------------------------------|---------------------------------------------------------------------|----------------------------------------------------------------------|---------------------------------------------------------------------|-----------------------------------------------------------------------|
| OneR                                  | HA-142 (28)<br>PA-X-213 (4)<br>NS1-171 (3)                          | HA-188 (12)<br>HA-219 (3)<br>NS1-95 (3)                             | HA-160 (7)<br>HA-285 (3)<br>HA-196 (2)                               | NA-46 (6)<br>HA-397 (3)<br>NA-86 (2)                                | HA-189 (4)<br>NA-79 (3)<br>NS1-226 (2)                                |
| JRip                                  | PB2-627 (4.07)<br>HA-218 (0.91)<br>NS1-95 (0.55)<br>NA-151 (0.43)   | PB2-701 (3.03)<br>NA-46 (0.89)<br>NS1-226 (0.53)<br>PA-X-207 (0.43) | PA-97 (1.40)<br>M1-227 (0.89)<br>M1-15 (0.52)<br>NA-29 (0.42)        | HA-297 (1.26)<br>NA-17 (0.71)<br>NS1-171 (0.51)<br>NA-371 (0.40)    | HA-452 (0.96)<br>NA-164a (0.58)<br>PB2-508 (0.48)<br>HA-278 (0.39)    |
| PART                                  | NS1-42 (20.29)<br>PB2-701 (11.53)<br>NP-492 (9.16)<br>HA-485 (7.56) | PA-97 (20.20)<br>NA-276 (10.35)<br>NP-133 (8.92)<br>PA-341 (6.67)   | PB2-714 (18.28)<br>NP-101 (10.19)<br>PB2-80 (8.71)<br>PB2-635 (6.23) | PB2-110 (16.72)<br>PA-556 (9.94)<br>M1-215 (8.20)<br>PB2-158 (6.08) | PB2-153 (13.26)<br>PB2-318 (9.26)<br>NS1-123 (7.58)<br>PB2-627 (5.83) |
| RF                                    | PA-97 (6.75)<br>PB2-355 (5.11)<br>HA-227 (3.88)<br>HA-142 (3.52)    | PB2-701 (6.54)<br>NP-34 (4.83)<br>NP-101 (3.78)<br>M1-30 (3.49)     | PA-X-97 (6.25)<br>PB2-627 (4.76)<br>PB2-699 (3.68)<br>PB2-675 (3.46) | NS1-42 (5.87)<br>PB2-714 (4.55)<br>HA-485 (3.66)<br>PB2-153 (3.43)  | HA-218 (5.53)<br>HA-186 (4.12)<br>PB2-318 (3.62)<br>NA-46 (3.35)      |
| <b>Three-class virulence grouping</b> |                                                                     |                                                                     |                                                                      |                                                                     |                                                                       |
| OneR                                  | HA-188 (34)<br>HA-94 (4)                                            | NA-370 (16)<br>NA-164a (4)                                          | NA-16 (10)<br>HA-8 (3)                                               | HA-142 (9)<br>HA-173 (2)                                            | HA-53 (6)<br>HA-285 (2)                                               |
| JRip                                  | PB2-627 (4.98)<br>HA-297 (1.02)<br>M2-28 (0.84)<br>PA-X-213 (0.59)  | PB2-701 (1.73)<br>HA-225 (0.94)<br>HA-266 (0.74)<br>HA-482 (0.58)   | NA-151 (1.45)<br>HA-452 (0.93)<br>NS1-42 (0.71)<br>M2-93 (0.54)      | NA-164a (1.37)<br>PB1-F2-28 (0.88)<br>PA-97 (0.68)<br>HA-160 (0.52) | HA-218 (1.20)<br>HA-327b (0.85)<br>NA-61 (0.68)<br>PB1-F2-49 (0.51)   |
| PART                                  | PB2-158 (12.81)<br>PB2-80 (9.21)<br>NA-441 (7.28)<br>PB1-578 (6.20) | PB2-110 (11.97)<br>NS2-67 (8.46)<br>NS1-28 (6.97)<br>PA-97 (6.19)   | NS1-42 (10.79)<br>PB2-265 (8.23)<br>M2-24 (6.87)<br>NP-101 (6.18)    | PB2-153 (10.56)<br>PB2-66 (7.92)<br>PB2-497 (6.54)<br>PB2-76 (6.07) | NA-276 (10.31)<br>PB2-627 (7.62)<br>HA-294 (6.51)<br>M1-215 (6.06)    |
| RF                                    | PB2-627 (6.69)<br>HA-218 (5.42)<br>NP-133 (4.51)<br>HA-227 (4.22)   | NS1-42 (6.49)<br>PB2-355 (5.41)<br>NP-101 (4.48)<br>HA-156 (4.17)   | HA-225 (6.41)<br>PA-X-97 (5.26)<br>PB2-153 (4.41)<br>PB2-714 (4.12)  | PB2-701 (6.34)<br>M1-215 (4.84)<br>M1-30 (4.35)<br>HA-188 (4.12)    | PA-97 (5.90)<br>PB2-699 (4.52)<br>NP-34 (4.31)<br>NA-49 (4.10)        |

574

575

576 **Fig. 1. Creation of benchmark datasets for IAV virulence prediction.** Note that for  
 577 simplicity, only the two-class and three-class virulence labels are illustrated in the table, while  
 578 original or estimate of LD50 is not shown.

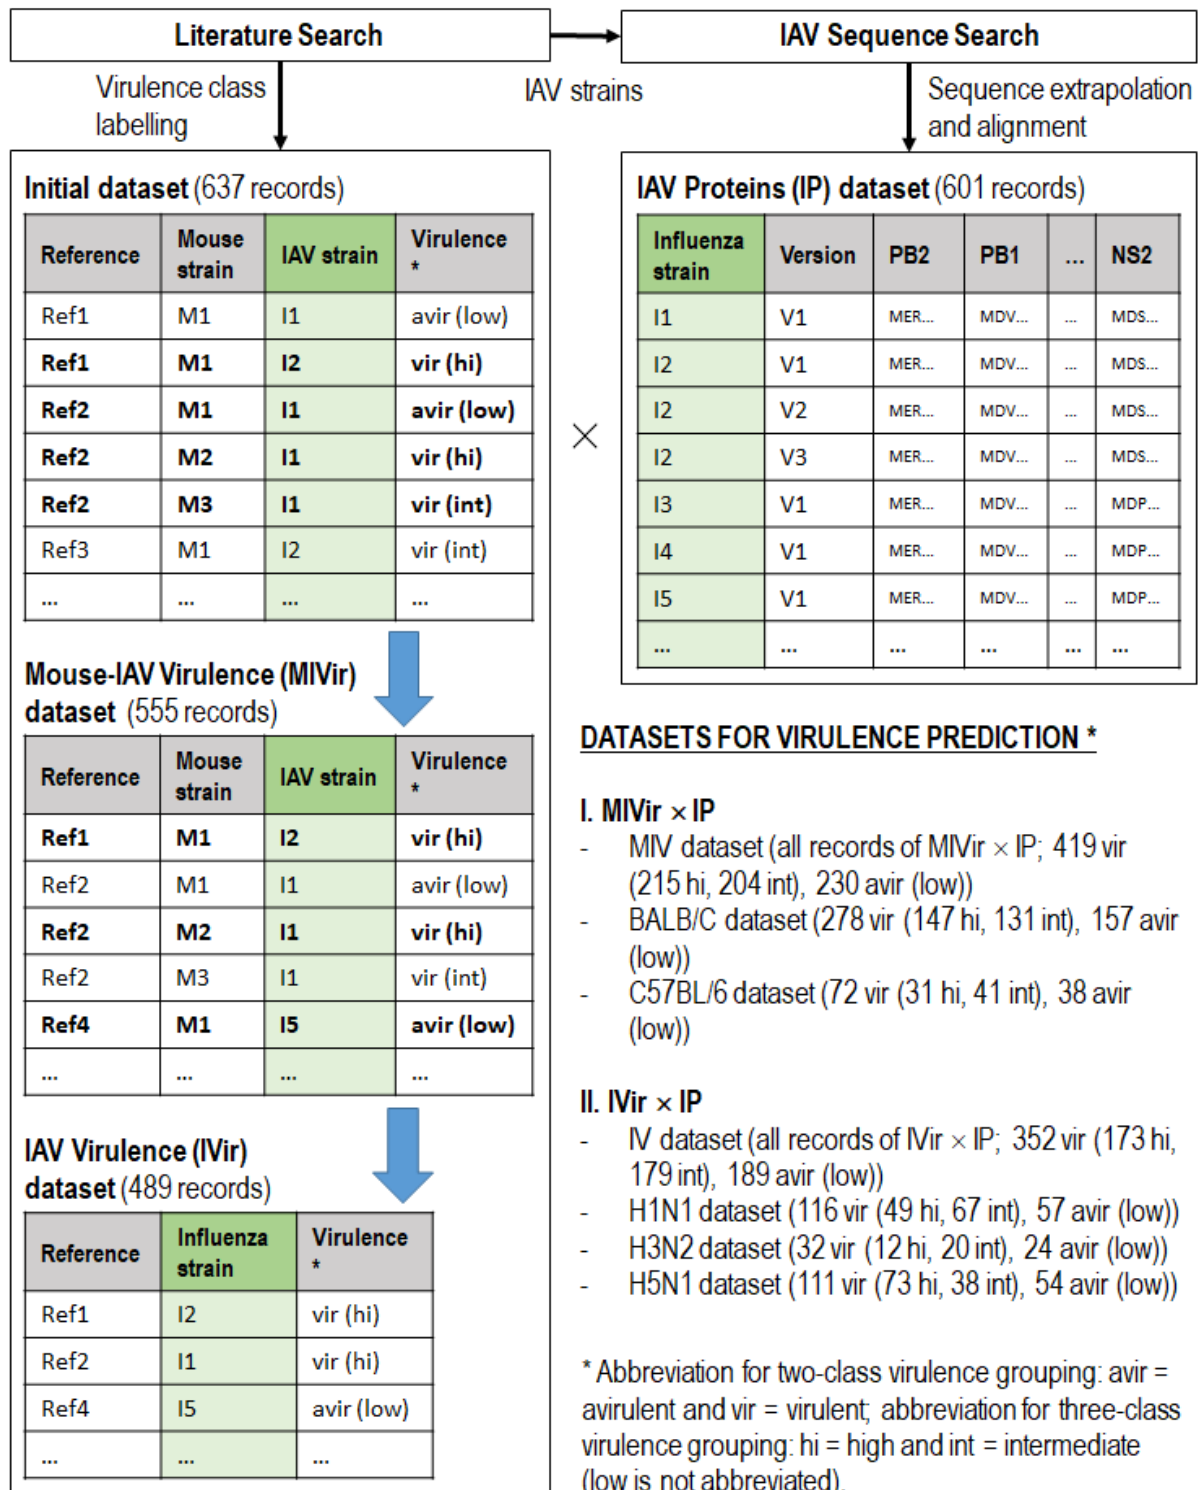

579

580

581

582 **Fig. 2. Three-dimensional MDS plot of concatenated alignments of IAV proteins.** Each  
583 data point representing a record of concatenated IAV proteins is colored based on the subtype  
584 and three-class virulence label of associated virus in three-class IV dataset.

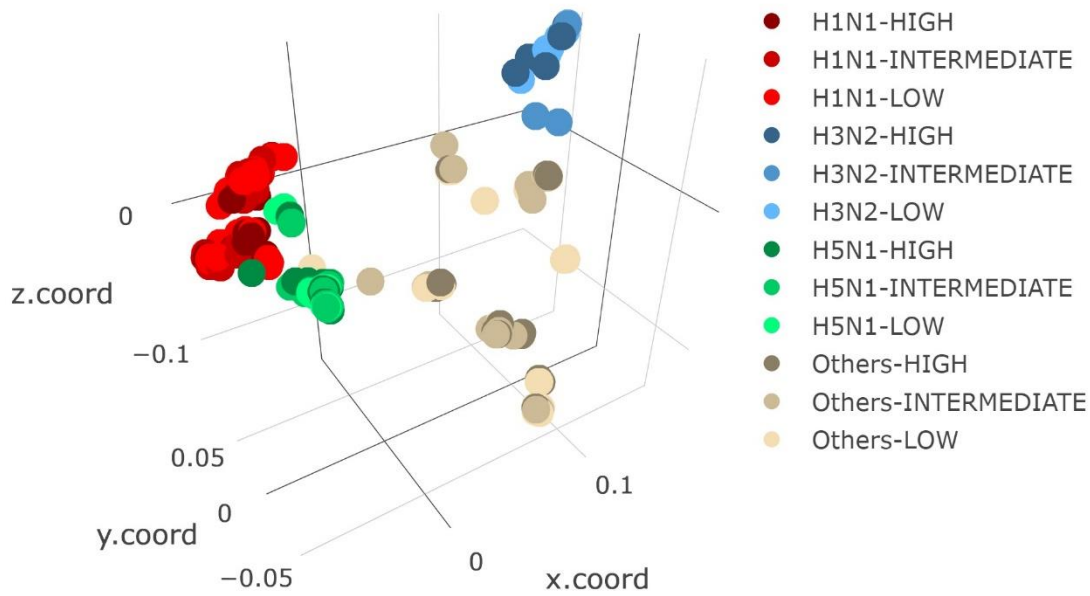

598 **Fig. 3. Correlations between sites in the protein alignment and their target virulence in**  
599 **the (A) two-class and (B) three-class IV datasets.** The Benjamini-Hochberg adjusted p-  
600 values of the chi-square test for independence between sites and their target virulence are used  
601 as a measure of the correlation. The red dashed horizontal line in each plot refers to the  
602 threshold for the significance of the tests (adjusted p-value <0.05).

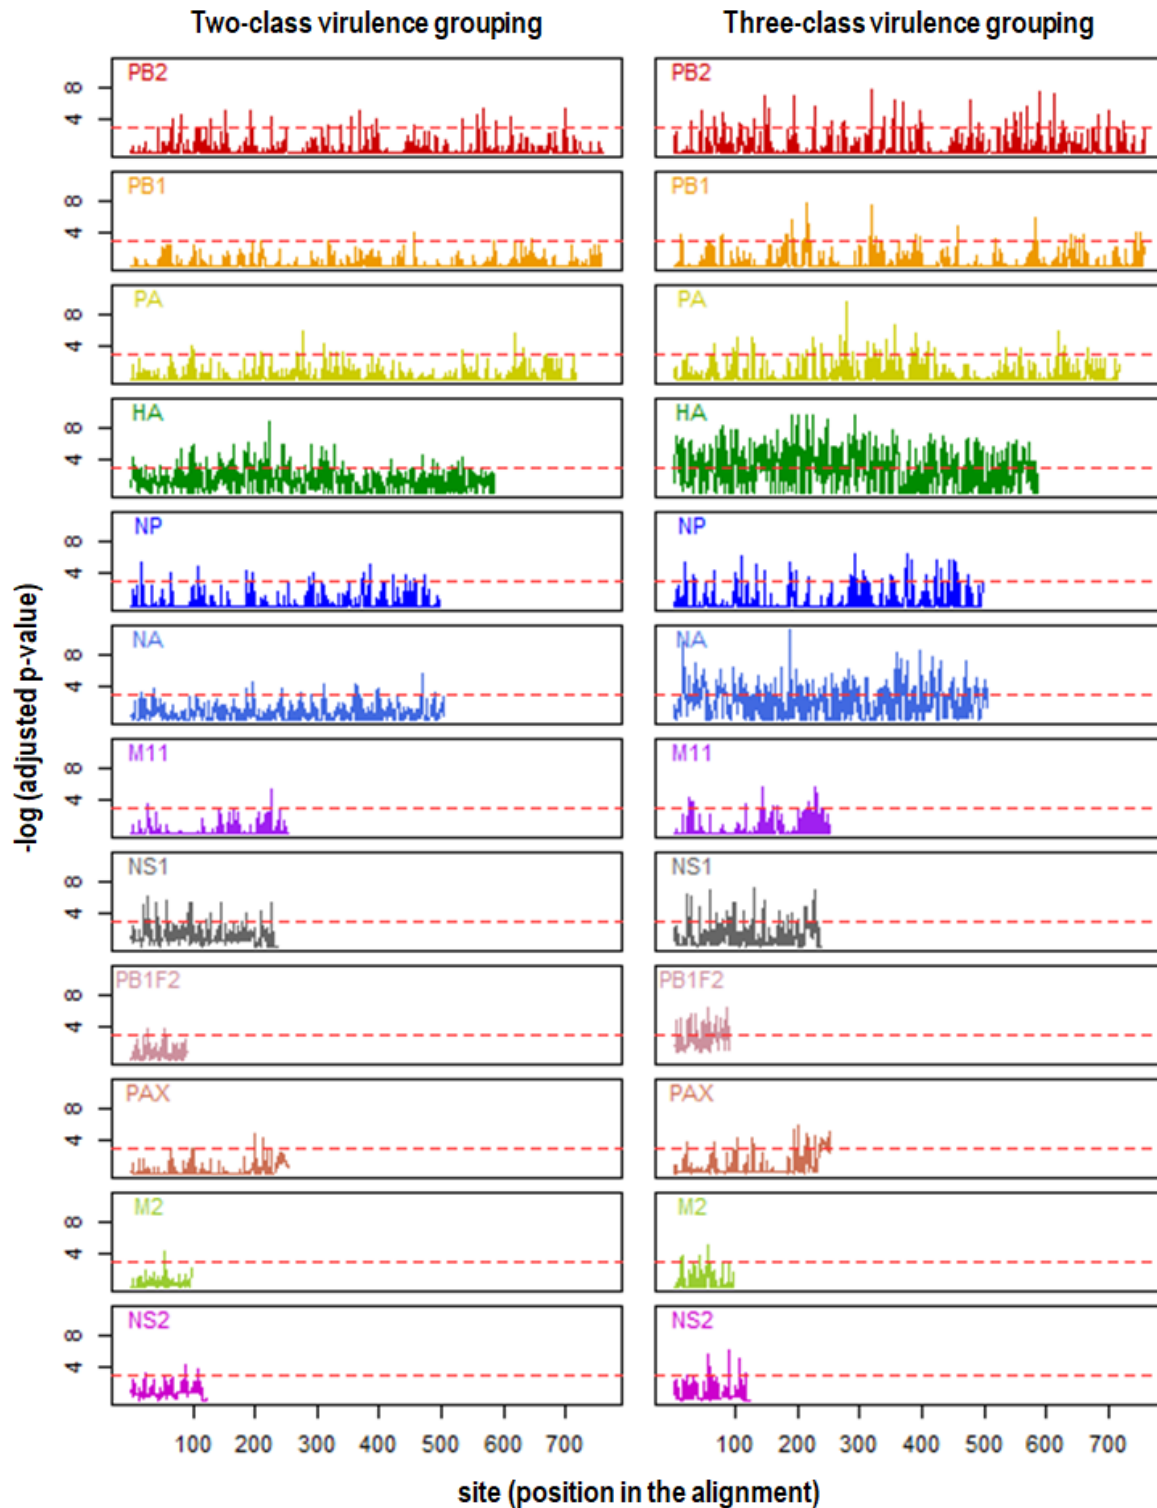

603



604 **Fig. 4. Accuracy distribution of 100 models learned independently from two-class and**  
605 **three-class MIV (A and B, respectively) and IV (C and D, respectively) datasets using**  
606 **OneR, JRip and PART.** The datasets contain either the concatenated alignments or an individual  
607 alignment of IAV proteins. Wilcoxon signed-rank sum test is used to test the null hypothesis that  
608 the median of the accuracy is equal to the accuracy of zero rule learner (represented by the red  
609 dashed horizontal line). The level of significance of each test is flagged by the stars: \* adjusted  
610 p-value <0.05, \*\* adjusted p-value <0.01 and \*\*\* adjusted p-value <0.001.

A. MIV dataset with two-class virulence grouping

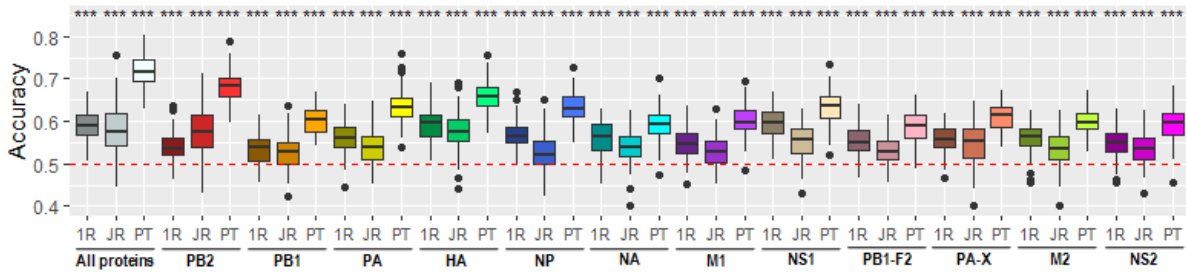

B. MIV dataset with three-class virulence grouping

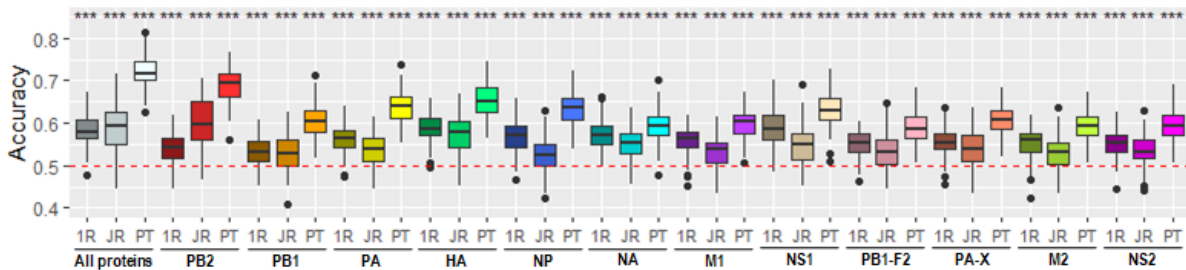

C. IV dataset with two-class virulence grouping

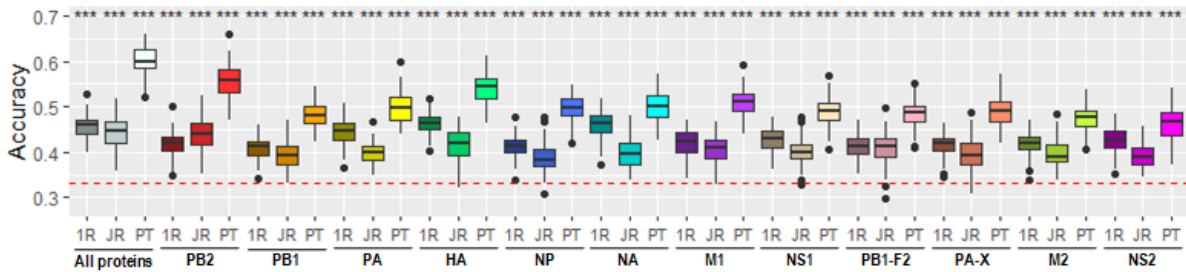

D. IV dataset with three-class virulence grouping

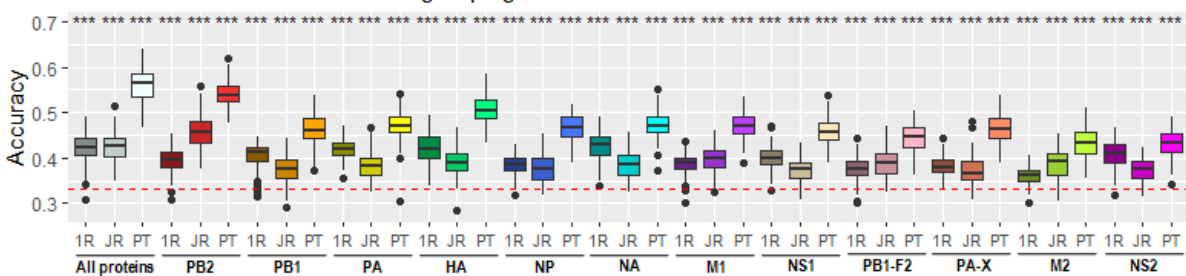

611

612

613

614

615

616 **Fig. 5. Synergistic graphs between protein sites that are based on models generated by**  
617 **PART from (A) two-class and (B) three-class IV datasets containing concatenated**  
618 **alignments of IAV proteins.** The nodes in the graph are the sites in IAV proteins – the proteins  
619 are encoded by color and the site numbers are written above the nodes. Two sites are connected  
620 by an edge if they appear in the top 50 site pairs that have the highest contribution to accuracy.  
621 The thickness of an edge indicates the level of contribution of the corresponding site pair to  
622 accuracy of PART models.

623 A. Two-class virulence grouping

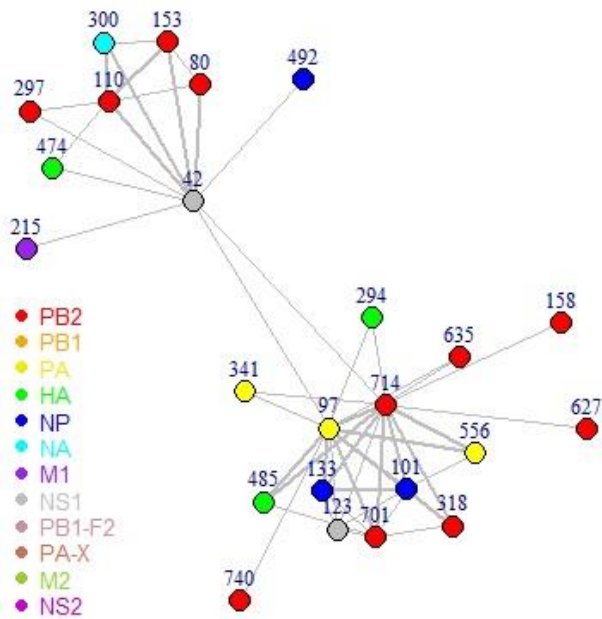

624

625 B. Three-class virulence grouping

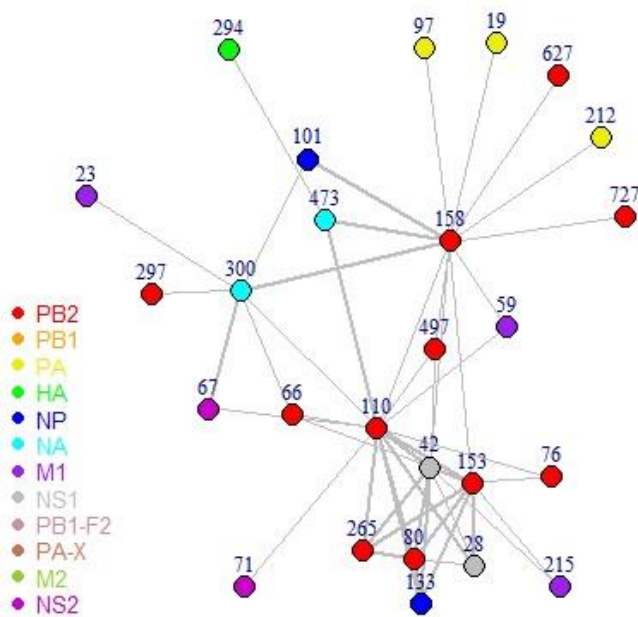

626

627

## 628 References

- 629 1. Sugita, Y., et al., *Configuration of viral ribonucleoprotein complexes within the influenza A*  
630 *virion*. J Virol, 2013. **87**(23): p. 12879-84.
- 631 2. Hale, B.G., et al., *The multifunctional NS1 protein of influenza A viruses*. J Gen Virol, 2008.  
632 **89**(Pt 10): p. 2359-76.
- 633 3. Paterson, D. and E. Fodor, *Emerging roles for the influenza A virus nuclear export protein*  
634 *(NEP)*. PLoS Pathog, 2012. **8**(12): p. e1003019.
- 635 4. Jagger, B.W., et al., *An overlapping protein-coding region in influenza A virus segment 3*  
636 *modulates the host response*. Science, 2012. **337**(6091): p. 199-204.
- 637 5. Kamal, R.P., I.V. Alymova, and I.A. York, *Evolution and Virulence of Influenza A Virus Protein*  
638 *PB1-F2*. Int J Mol Sci, 2017. **19**(1).
- 639 6. Poovorawan, Y., et al., *Global alert to avian influenza virus infection: from H5N1 to H7N9*.  
640 Pathog Glob Health, 2013. **107**(5): p. 217-23.
- 641 7. Su, S., et al., *Epidemiology, Evolution, and Recent Outbreaks of Avian Influenza Virus in*  
642 *China*. J Virol, 2015. **89**(17): p. 8671-6.
- 643 8. Ma, M.J., et al., *Influenza A(H7N9) Virus Antibody Responses in Survivors 1 Year after*  
644 *Infection, China, 2017*. Emerg Infect Dis, 2018. **24**(4): p. 663-672.
- 645 9. Lindenmann, J., *Inheritance of Resistance to Influenza Virus in Mice*. Proc Soc Exp Biol Med,  
646 1964. **116**: p. 506-9.
- 647 10. Verhelst, J., et al., *Interferon-inducible protein Mx1 inhibits influenza virus by interfering with*  
648 *functional viral ribonucleoprotein complex assembly*. J Virol, 2012. **86**(24): p. 13445-55.
- 649 11. Kamal, R.P., J.M. Katz, and I.A. York, *Molecular determinants of influenza virus pathogenesis*  
650 *in mice*. Curr Top Microbiol Immunol, 2014. **385**: p. 243-74.
- 651 12. Medina, R.A. and A. Garcia-Sastre, *Influenza A viruses: new research developments*. Nat Rev  
652 Microbiol, 2011. **9**(8): p. 590-603.
- 653 13. Imai, M. and Y. Kawaoka, *The role of receptor binding specificity in interspecies transmission*  
654 *of influenza viruses*. Curr Opin Virol, 2012. **2**(2): p. 160-7.
- 655 14. Conenello, G.M., et al., *A single mutation in the PB1-F2 of H5N1 (HK/97) and 1918 influenza*  
656 *A viruses contributes to increased virulence*. PLoS Pathog, 2007. **3**(10): p. 1414-21.
- 657 15. Song, J., et al., *Synergistic Effect of S224P and N383D Substitutions in the PA of H5N1 Avian*  
658 *Influenza Virus Contributes to Mammalian Adaptation*. Sci Rep, 2015. **5**: p. 10510.
- 659 16. Seyer, R., et al., *Synergistic adaptive mutations in the hemagglutinin and polymerase acidic*  
660 *protein lead to increased virulence of pandemic 2009 H1N1 influenza A virus in mice*. J Infect  
661 Dis, 2012. **205**(2): p. 262-71.
- 662 17. Peng, Y., et al., *Identification of genome-wide nucleotide sites associated with mammalian*  
663 *virulence in influenza A viruses*. bioRxiv, 2018.
- 664 18. Lycett, S.J., et al., *Detection of mammalian virulence determinants in highly pathogenic avian*  
665 *influenza H5N1 viruses: multivariate analysis of published data*. J Virol, 2009. **83**(19): p.  
666 9901-10.
- 667 19. Reed, L.J. and H. Muench, *A simple method of estimating fifty percent endpoints* American  
668 Journal of Epidemiology, 1938. **27**(3): p. 493-7.
- 669 20. Hornik, K., C. Buchta, and A. Zeileis, *Open-source machine learning: R meets Weka*.  
670 Computational Statistics, 2009. **24**(2): p. 225-232.
- 671 21. Liaw, A. and M. Wiener, *Classification and Regression by randomForest*. R News, 2002. **2**(3):  
672 p. 18-22.
- 673 22. Edgar, R.C., *MUSCLE: multiple sequence alignment with high accuracy and high throughput*.  
674 Nucleic Acids Res, 2004. **32**(5): p. 1792-7.
- 675 23. Venables, W.N., B.D. Ripley, and W.N. Venables, *Modern applied statistics with S*. 4th ed.  
676 Statistics and computing. 2002, New York: Springer. xi, 495 p.

- 677 24. Csardi, G. and T. Nepusz, *The igraph software package for complex network research*.  
678 InterJournal, 2006. **Complex Systems**: p. 1695.
- 679 25. World Health Organization, *Production of pilot lots of inactivated influenza vaccine in*  
680 *response to a pandemic threat: an interim biosafety risk assessment*. Wkly Epidemiol Rec,  
681 2003. **78**(47): p. 405-8.
- 682 26. Casadevall, A., *The Pathogenic Potential of a Microbe*. mSphere, 2017. **2**(1).
- 683 27. Holte, R., *Very Simple Classification Rules Perform Well on Most Commonly Used Datasets*.  
684 Machine Learning, 1993. **11**: p. 63-91.
- 685 28. Cohen, W.W., *Fast effective rule induction*, in *Proceedings of the Twelfth International*  
686 *Conference on International Conference on Machine Learning*, A. Prieditis and S. Russell,  
687 Editors. 1995, Morgan Kaufmann Publishers Inc. San Francisco, CA.
- 688 29. Frank, E. and I.H. Witten, *Generating accurate rule sets without global optimization*, in *ICML*  
689 *'98 Proceedings of the Fifteenth International Conference on Machine Learning*, J. Shavlik,  
690 Editor. 1998, Morgan Kaufmann Publishers Inc. San Francisco, CA.
- 691 30. Breiman, L., *Random forests*. Machine Learning, 2001. **45**(1): p. 5-32.
- 692 31. Mair, C.M., et al., *Receptor binding and pH stability - how influenza A virus hemagglutinin*  
693 *affects host-specific virus infection*. Biochim Biophys Acta, 2014. **1838**(4): p. 1153-68.
- 694 32. Arai, Y., et al., *Multiple polymerase gene mutations for human adaptation occurring in Asian*  
695 *H5N1 influenza virus clinical isolates*. Sci Rep, 2018. **8**(1): p. 13066.
- 696 33. Czudai-Matwich, V., et al., *PB2 mutations D701N and S714R promote adaptation of an*  
697 *influenza H5N1 virus to a mammalian host*. J Virol, 2014. **88**(16): p. 8735-42.
- 698 34. Fan, S., et al., *Novel residues in avian influenza virus PB2 protein affect virulence in*  
699 *mammalian hosts*. Nat Commun, 2014. **5**: p. 5021.
- 700 35. Wang, J., et al., *Mouse-adapted H9N2 influenza A virus PB2 protein M147L and E627K*  
701 *mutations are critical for high virulence*. PLoS One, 2012. **7**(7): p. e40752.
- 702 36. Wang, X., et al., *Synergistic effect of PB2 283M and 526R contributes to enhanced virulence*  
703 *of H5N8 influenza viruses in mice*. Vet Res, 2017. **48**(1): p. 67.
- 704 37. Sediri, H., et al., *PB2 subunit of avian influenza virus subtype H9N2: a pandemic risk factor*. J  
705 Gen Virol, 2016. **97**(1): p. 39-48.
- 706 38. Fan, S., et al., *Synergistic effect of the PDZ and p85beta-binding domains of the NS1 protein*  
707 *on virulence of an avian H5N1 influenza A virus*. J Virol, 2013. **87**(9): p. 4861-71.
- 708 39. Pu, J., et al., *Synergism of co-mutation of two amino acid residues in NS1 protein increases*  
709 *the pathogenicity of influenza virus in mice*. Virus Res, 2010. **151**(2): p. 200-4.
- 710 40. Chen, H., et al., *Polygenic virulence factors involved in pathogenesis of 1997 Hong Kong*  
711 *H5N1 influenza viruses in mice*. Virus Res, 2007. **128**(1-2): p. 159-63.
- 712 41. Cheng, K., et al., *PB2-E627K and PA-T97I substitutions enhance polymerase activity and*  
713 *confer a virulent phenotype to an H6N1 avian influenza virus in mice*. Virology, 2014. **468**-  
714 **470**: p. 207-213.
- 715 42. Katz, J.M., et al., *Molecular correlates of influenza A H5N1 virus pathogenesis in mice*. J Virol,  
716 2000. **74**(22): p. 10807-10.
- 717 43. Li, J., et al., *PB1-mediated virulence attenuation of H5N1 influenza virus in mice is associated*  
718 *with PB2*. J Gen Virol, 2011. **92**(Pt 6): p. 1435-44.
- 719 44. Ping, J., et al., *PB2 and hemagglutinin mutations are major determinants of host range and*  
720 *virulence in mouse-adapted influenza A virus*. J Virol, 2010. **84**(20): p. 10606-18.
- 721 45. Song, M.S., et al., *Virulence and genetic compatibility of polymerase reassortant viruses*  
722 *derived from the pandemic (H1N1) 2009 influenza virus and circulating influenza A viruses*. J  
723 Virol, 2011. **85**(13): p. 6275-86.
- 724 46. Zhang, X., et al., *Enhanced pathogenicity and neurotropism of mouse-adapted H10N7*  
725 *influenza virus are mediated by novel PB2 and NA mutations*. J Gen Virol, 2017. **98**(6): p.  
726 1185-1195.

- 727 47. Bussey, K.A., et al., *PB2 residue 271 plays a key role in enhanced polymerase activity of*  
728 *influenza A viruses in mammalian host cells.* J Virol, 2010. **84**(9): p. 4395-406.
- 729 48. Hatta, M., et al., *Molecular basis for high virulence of Hong Kong H5N1 influenza A viruses.*  
730 *Science*, 2001. **293**(5536): p. 1840-2.
- 731 49. Sun, H., et al., *PB2 segment promotes high-pathogenicity of H5N1 avian influenza viruses in*  
732 *mice.* Front Microbiol, 2015. **6**: p. 73.
- 733 50. Park, S.J., et al., *Altered virulence of Highly Pathogenic Avian Influenza (HPAI) H5N8*  
734 *reassortant viruses in mammalian models.* Virulence, 2018. **9**(1): p. 133-148.
- 735 51. Bi, Y., et al., *Assessment of the internal genes of influenza A (H7N9) virus contributing to high*  
736 *pathogenicity in mice.* J Virol, 2015. **89**(1): p. 2-13.
- 737 52. Hu, M., et al., *PB2 substitutions V598T/I increase the virulence of H7N9 influenza A virus in*  
738 *mammals.* Virology, 2017. **501**: p. 92-101.
- 739 53. Li, W., et al., *The PB2 mutation with lysine at 627 enhances the pathogenicity of avian*  
740 *influenza (H7N9) virus which belongs to a non-zoonotic lineage.* Sci Rep, 2017. **7**(1): p. 2352.
- 741 54. Mok, C.K., et al., *Amino acid substitutions in polymerase basic protein 2 gene contribute to*  
742 *the pathogenicity of the novel A/H7N9 influenza virus in mammalian hosts.* J Virol, 2014.  
743 **88**(6): p. 3568-76.
- 744 55. Xiao, C., et al., *PB2-588 V promotes the mammalian adaptation of H10N8, H7N9 and H9N2*  
745 *avian influenza viruses.* Sci Rep, 2016. **6**: p. 19474.
- 746 56. Wang, C., et al., *PB2-Q591K Mutation Determines the Pathogenicity of Avian H9N2 Influenza*  
747 *Viruses for Mammalian Species.* PLoS One, 2016. **11**(9): p. e0162163.
- 748 57. Neumann, G., *H5N1 influenza virulence, pathogenicity and transmissibility: what do we*  
749 *know?* Future Virol, 2015. **10**(8): p. 971-980.
- 750 58. Boivin, S. and D.J. Hart, *Interaction of the influenza A virus polymerase PB2 C-terminal region*  
751 *with importin alpha isoforms provides insights into host adaptation and polymerase*  
752 *assembly.* J Biol Chem, 2011. **286**(12): p. 10439-48.
- 753 59. Gabriel, G., et al., *The viral polymerase mediates adaptation of an avian influenza virus to a*  
754 *mammalian host.* Proc Natl Acad Sci U S A, 2005. **102**(51): p. 18590-5.
- 755 60. Lee, C.Y., et al., *Prerequisites for the acquisition of mammalian pathogenicity by influenza A*  
756 *virus with a prototypic avian PB2 gene.* Sci Rep, 2017. **7**(1): p. 10205.
- 757 61. Zhou, B., et al., *PB2 residue 158 is a pathogenic determinant of pandemic H1N1 and H5*  
758 *influenza A viruses in mice.* J Virol, 2011. **85**(1): p. 357-65.
- 759 62. Kato, Y.S., K. Fukui, and K. Suzuki, *Mechanism of a Mutation in Non-Structural Protein 1*  
760 *Inducing High Pathogenicity of Avian Influenza Virus H5N1.* Protein Pept Lett, 2016. **23**(4): p.  
761 372-8.
- 762 63. Cheng, J., et al., *Effects of the S42 residue of the H1N1 swine influenza virus NS1 protein on*  
763 *interferon responses and virus replication.* Virol J, 2018. **15**(1): p. 57.
- 764 64. Fan, S., et al., *Two amino acid residues in the matrix protein M1 contribute to the virulence*  
765 *difference of H5N1 avian influenza viruses in mice.* Virology, 2009. **384**(1): p. 28-32.
- 766 65. Blazejewska, P., et al., *Pathogenicity of different PR8 influenza A virus variants in mice is*  
767 *determined by both viral and host factors.* Virology, 2011. **412**(1): p. 36-45.
- 768 66. Boon, A.C., et al., *Host genetic variation affects resistance to infection with a highly*  
769 *pathogenic H5N1 influenza A virus in mice.* J Virol, 2009. **83**(20): p. 10417-26.
- 770 67. Davidson, S., et al., *Pathogenic potential of interferon alphabeta in acute influenza infection.*  
771 *Nat Commun*, 2014. **5**: p. 3864.
- 772 68. Pica, N., et al., *The DBA.2 mouse is susceptible to disease following infection with a broad,*  
773 *but limited, range of influenza A and B viruses.* J Virol, 2011. **85**(23): p. 12825-9.
- 774 69. Srivastava, B., et al., *Host genetic background strongly influences the response to influenza A*  
775 *virus infections.* PLoS One, 2009. **4**(3): p. e4857.
- 776 70. Ye, J., et al., *Variations in the hemagglutinin of the 2009 H1N1 pandemic virus: potential for*  
777 *strains with altered virulence phenotype?* PLoS Pathog, 2010. **6**(10): p. e1001145.

- 778 71. Zhou, K., et al., *Swift and Strong NK Cell Responses Protect 129 Mice against High-Dose*  
779 *Influenza Virus Infection*. *J Immunol*, 2016. **196**(4): p. 1842-54.
